# Supplementary material
Source: PubMed Central journal article supplement (PMC5090213)
Supplement: EMBJ-35-2301-s001.pdf [file EMBJ-35-2301-s001.pdf]

## Expanded View Figures

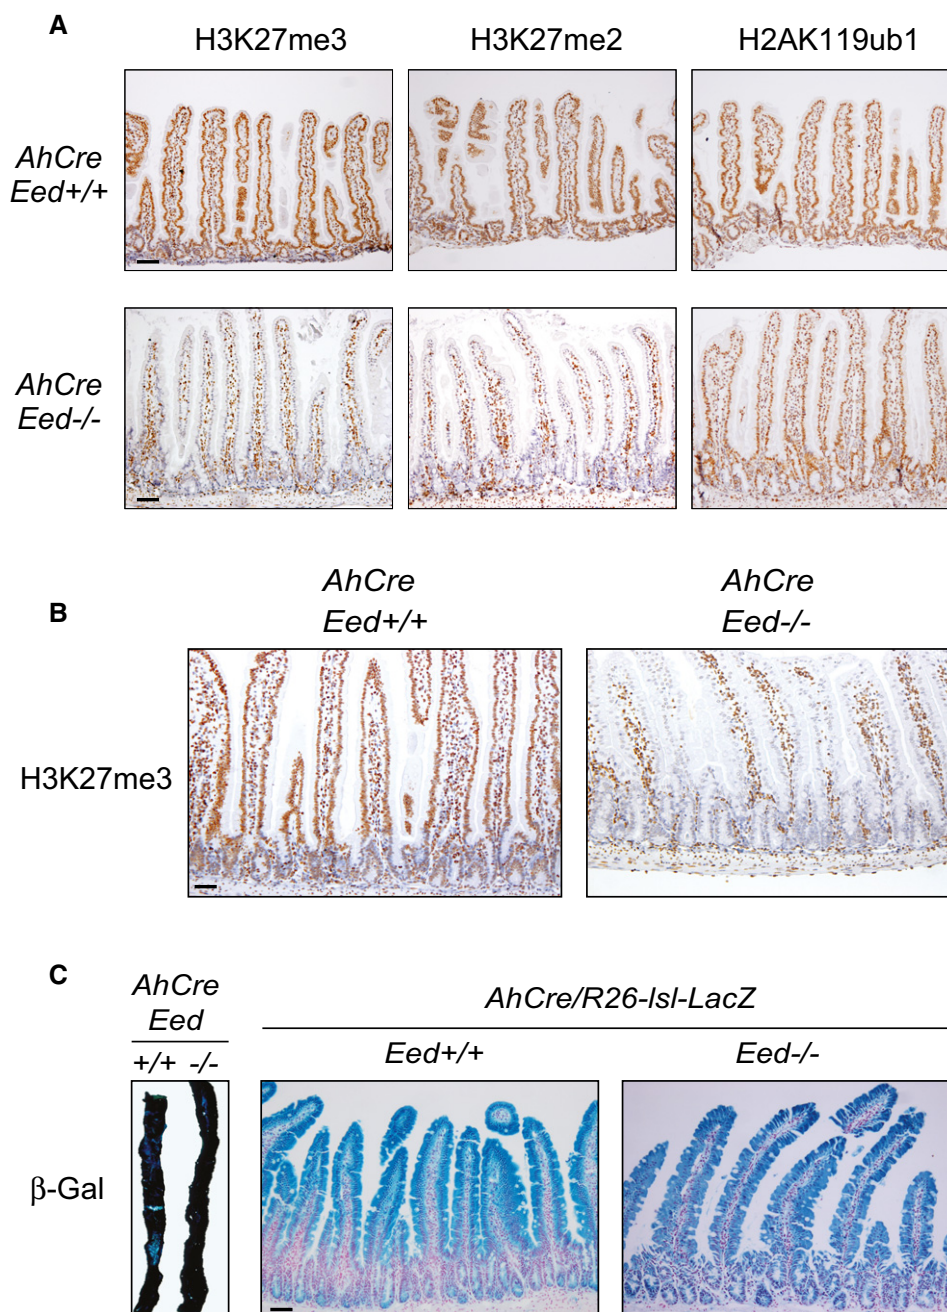

**Figure EV1. Loss of *Eed* affects H3K27 methylation.**

- A Wider fields of the same immunohistochemistry staining presented in Fig 1A, performed on small intestinal sections from *AhCre Eed*<sup>+/+</sup> and *AhCre Eed*<sup>fl/fl</sup> mice injected with  $\beta$ -naphthoflavone and sacrificed after 15 days, using the indicated antibodies.
- B Immunohistochemistry of small intestinal sections from *AhCre Eed*<sup>+/+</sup> and *AhCre Eed*<sup>fl/fl</sup> mice using an H3K27me3-specific antibody, analysed 30 days after  $\beta$ -naphthoflavone injection ( $n = 5$ ).
- C Whole intestine isolated from *AhCre Eed*<sup>+/+</sup> and *AhCre Eed*<sup>fl/fl</sup> crossed with knock-in mice expressing *Rosa26*-driven Cre-inducible LacZ transgene stained (left panels) for  $\beta$ -galactosidase activity, 30 days after the first  $\beta$ -naphthoflavone administration. Sections of the  $\beta$ -galactosidase-stained small intestines are presented in the right panels ( $n = 4$ ).

Data information: All scale bars represent 100  $\mu$ m.

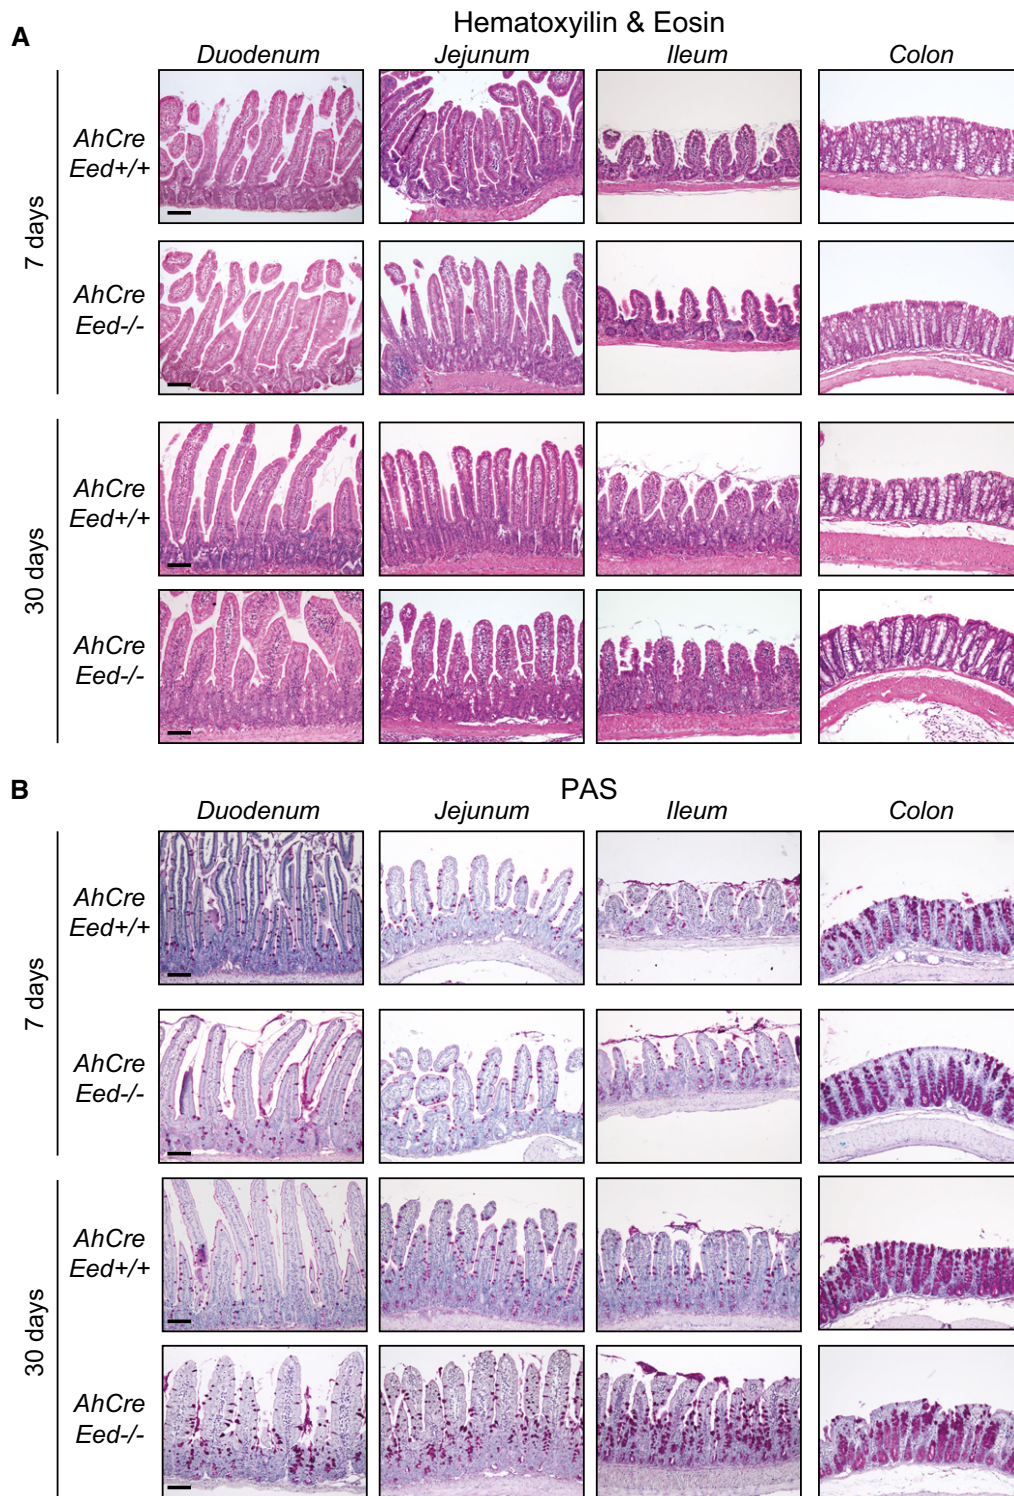

**Figure EV2. *Eed* loss perturbs intestinal architecture and increases goblet cell numbers.**

*AhCre Eed<sup>+/+</sup>* and *AhCre Eed<sup>fl/fl</sup>* mice were sacrificed 7 or 30 days after  $\beta$ -naphthoflavone administration.

A Haematoxylin and eosin staining of sections prepared from the different intestinal tracts.

B PAS staining performed on sections prepared from the different intestinal tracts.

Data information: All scale bars represent 100  $\mu$ m.

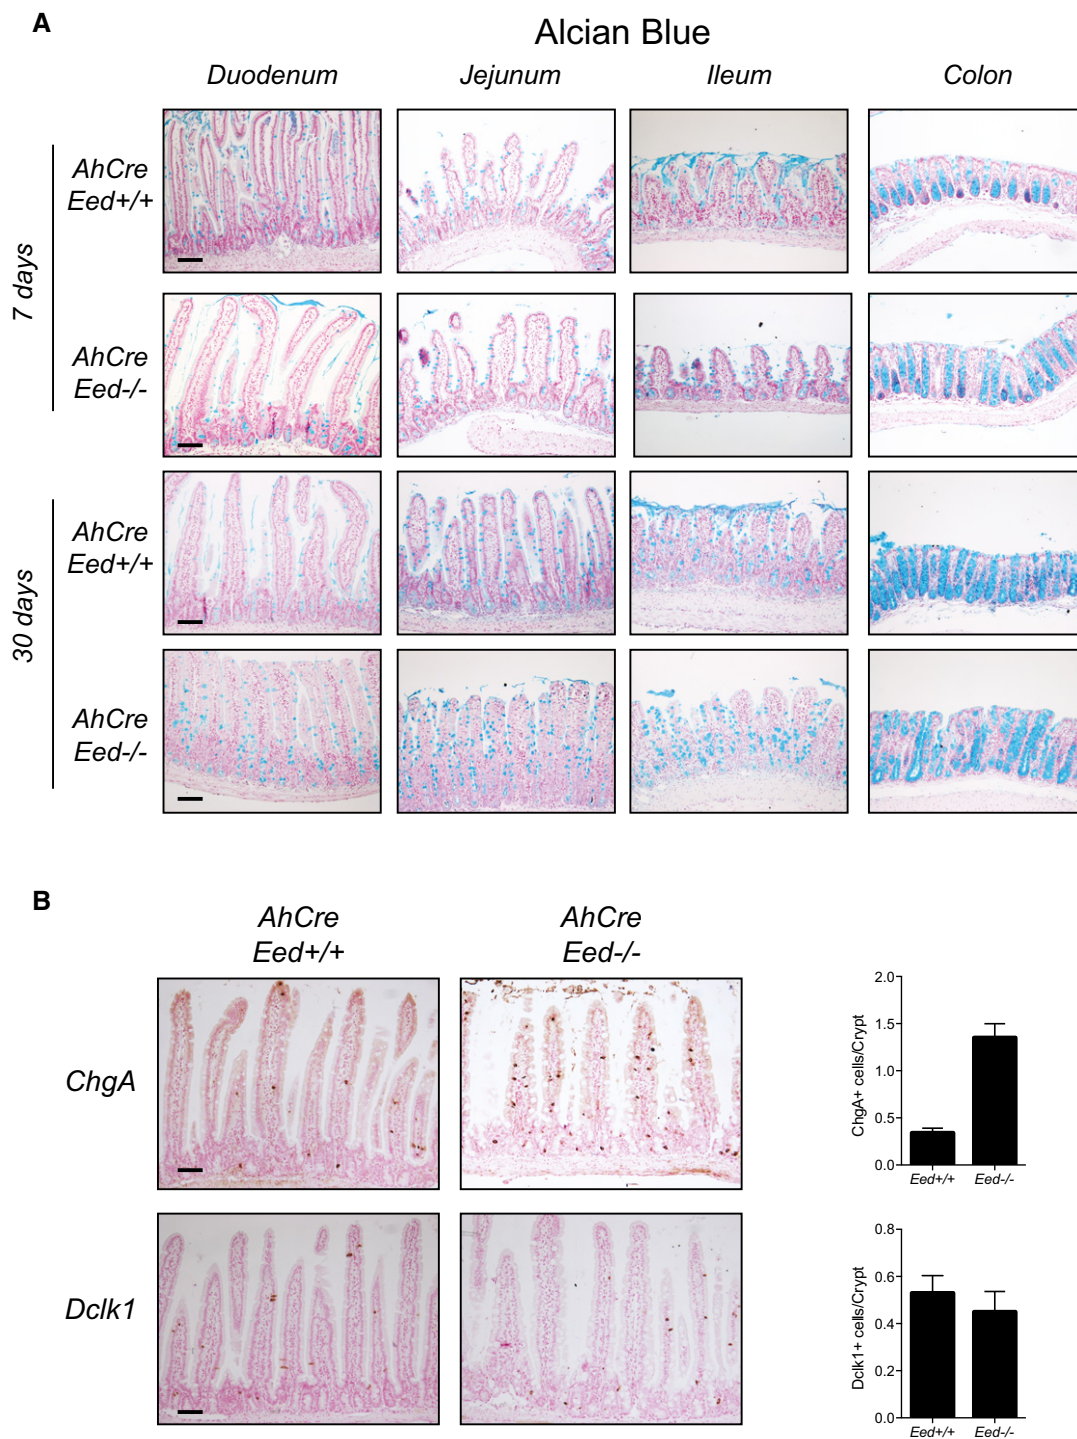

**Figure EV3. Eed loss increases the number of goblet and enteroendocrine cells.**

A Alcian blue staining on sections prepared from the different intestinal tracts. *AhCre Eed<sup>+/+</sup>* and *AhCre Eed<sup>fl/fl</sup>* mice were sacrificed 7 or 30 days after  $\beta$ -naphthoflavone administration.

B Immunohistochemistry analyses of small intestinal sections from *AhCre Eed<sup>+/+</sup>* and *AhCre Eed<sup>fl/fl</sup>* mice isolated 15 days after  $\beta$ -naphthoflavone administration using ChgA (an enteroendocrine marker)- and Dclk1 (a tuft cell marker)-specific antibodies. Quantifications of positive cells per crypt for each staining are presented on the right (mean  $\pm$  SD). More than 100 crypts were scored for each condition.

Data information: All scale bars represent 100  $\mu$ m.

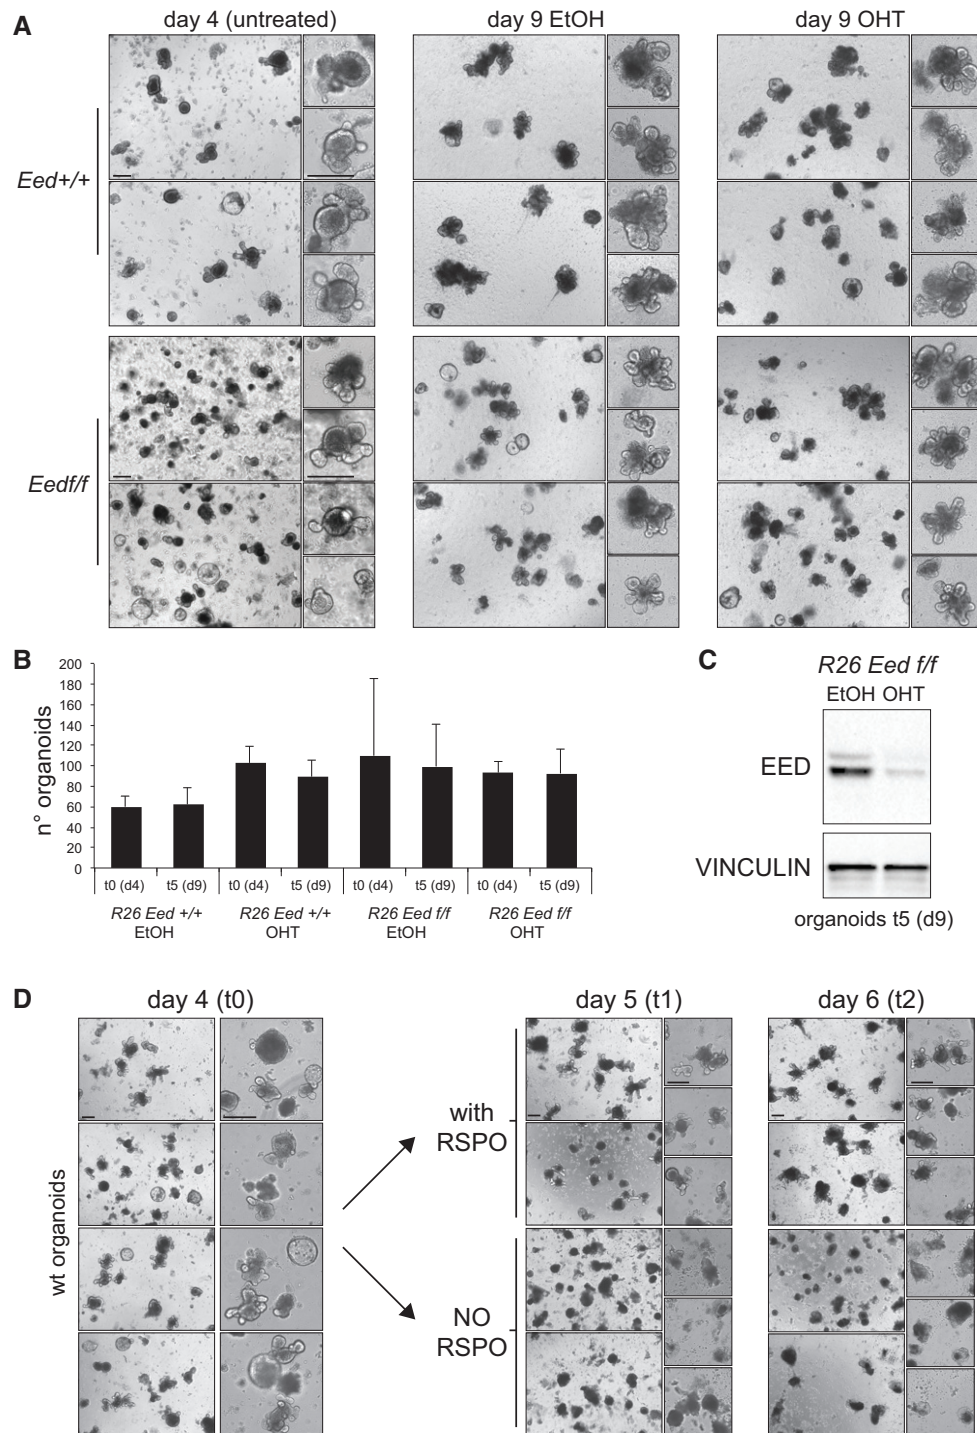

**Figure EV4. Loss of *Eed* does not alter general organoids homeostasis.**

A *In vitro* organoids formation using crypts isolated from *Rosa26 CreERT2 Eed*<sup>+/+</sup> and *Eed*<sup>ff/ff</sup> mice treated after 4 days with 4-OHT or EtOH (as control). Organoid homeostasis was monitored for additional 5 days (day 9).

B Quantifications of the analysis presented in (A) after 5 days of OHT or EtOH treatment (mean  $\pm$  SD;  $n = 3$ ).

C Western blot analysis of the organoids presented in (A) at day 9 using EED-specific antibodies. Vinculin is presented as a loading control.

D *In vitro* organoids formation using crypts isolated from wild-type mice. RSPO1 was removed after 4 days (t0) and the effects on organoids homeostasis were monitored 24 and 48 h after RSPO1 removal (t1 and t2, right panels).

Data information: All scale bars represent 200  $\mu$ m.

Source data are available online for this figure.

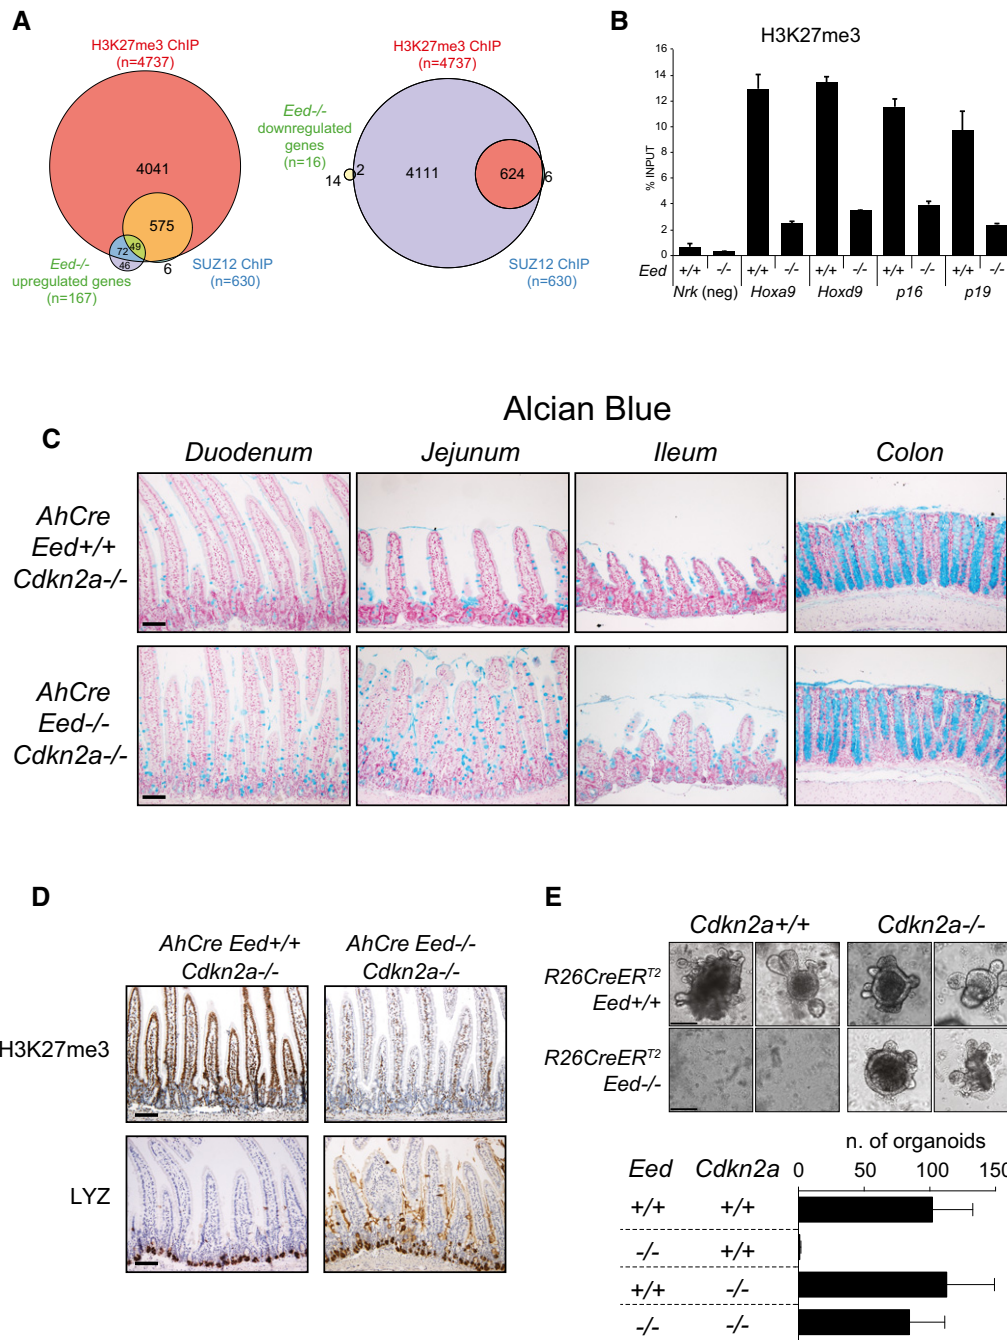

**Figure EV5. PRC2 directly maintains transcriptional repression, and *Eed* loss increases goblet cell differentiation, independently from *Cdkn2a* activation.**

**A** Venn diagrams showing the extent of overlap between SUZ12 occupancy and H3K27me3 deposition in wild-type crypts with respect to the upregulated and downregulated genes in *Eed*<sup>-/-</sup> crypts.

**B** ChIP analyses for the indicated gene promoters using an H3K27me3-specific antibody in crypts isolated from *AhCre Eed*<sup>+/+</sup> and *AhCre Eed*<sup>fl/fl</sup> mice 15 days after  $\beta$ -naphthoflavone administration. Primers amplifying the *Nrk* gene body are presented as negative PRC2 target.

**C** Alcian blue staining of sections prepared from different intestinal tracts isolated from *AhCre Cdkn2a*<sup>-/-</sup> *Eed*<sup>+/+</sup> and *AhCre Cdkn2a*<sup>-/-</sup> *Eed*<sup>fl/fl</sup> mice 15 days after the first  $\beta$ -naphthoflavone administration.

**D** Immunohistochemical analysis of small intestinal sections, using antibodies specific for H3K27me3 and lysozyme (LYZ, a Paneth cell marker) in *AhCre Cdkn2a*<sup>-/-</sup> *Eed*<sup>+/+</sup> and *AhCre Cdkn2a*<sup>-/-</sup> *Eed*<sup>fl/fl</sup> mice 15 days after the first  $\beta$ -naphthoflavone administration.

**E** *In vitro* organoid formation using crypts isolated from *Rosa26 CreER*<sup>T2</sup> *Cdkn2a*<sup>+/+</sup> *Eed*<sup>+/+</sup> or *Eed*<sup>fl/fl</sup> and *Rosa26 CreER*<sup>T2</sup> *Cdkn2a*<sup>-/-</sup> *Eed*<sup>+/+</sup> or *Eed*<sup>fl/fl</sup> mice 9 days after the first tamoxifen injection (mean  $\pm$  SD).

Data information: All scale bars represent 100  $\mu$ m.

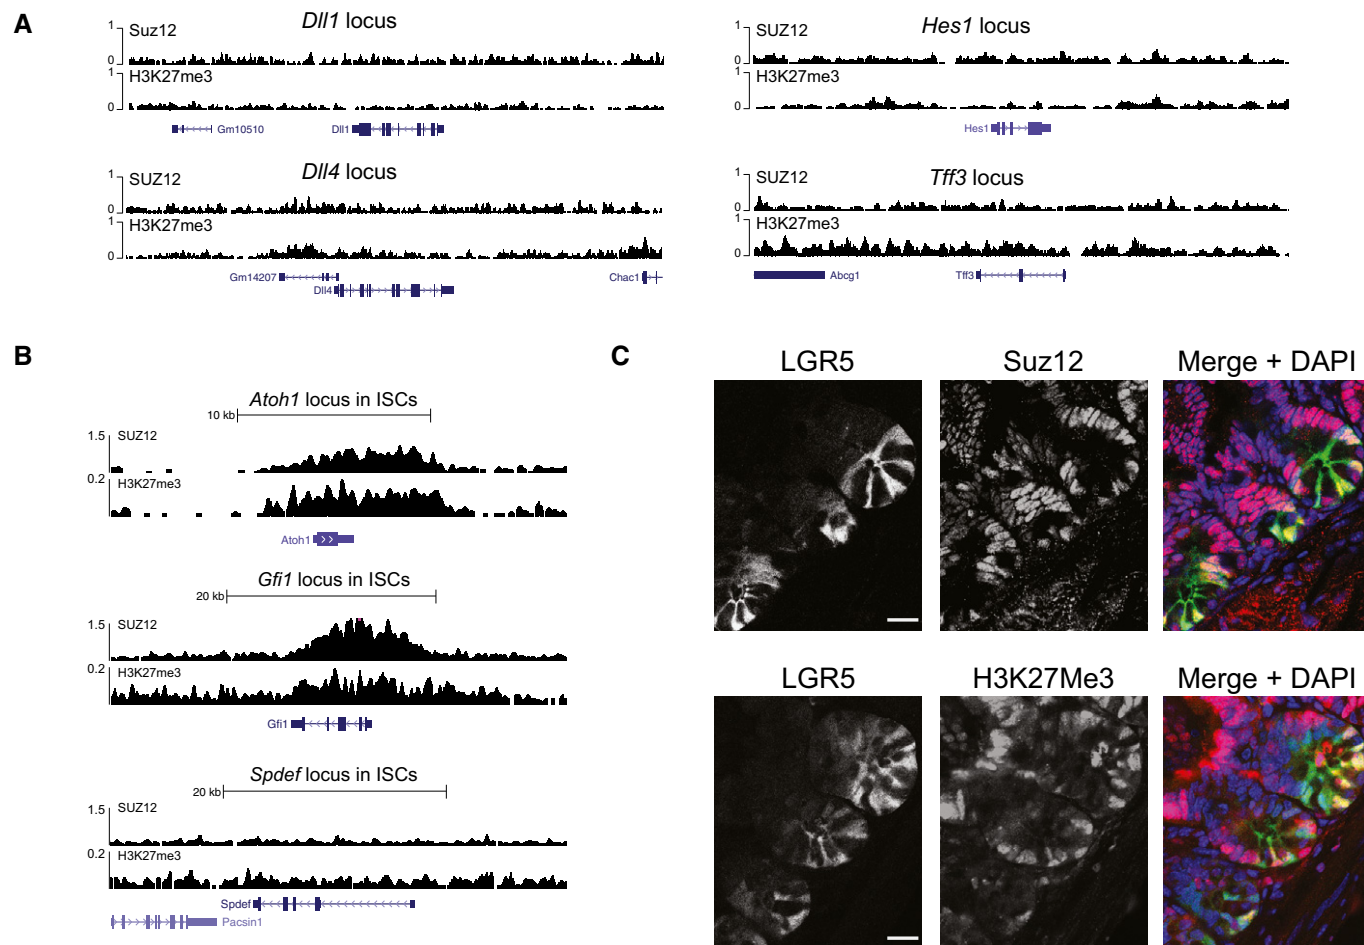

**Figure EV6. PRC2 is active in intestinal stem cells.**

A, B Genomic snapshots of the indicated genomic loci for SUZ12 occupancy and H3K27me3 deposition in intestinal crypts (A) or ISCs (B).

C SUZ12 and H3K27me3 immunofluorescence staining (red) and Lgr5-eGFP expression (green) in near-native agarose-embedded small intestinal sections. Scale bar represents 25 μm.
