# Supplementary material
Source: PubMed Central journal article supplement (PMC5090213)

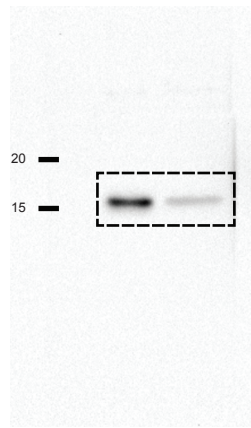

H3K27Me1

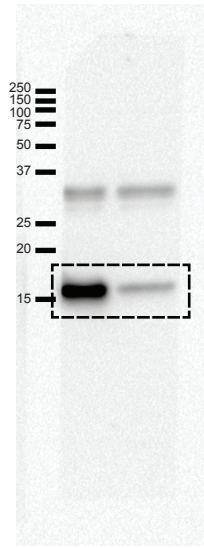

H3K27Me2

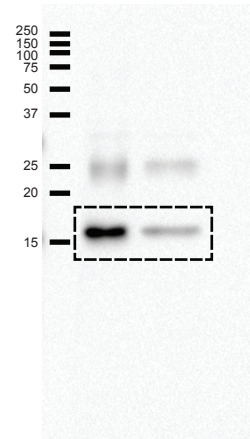

H3K27Me3

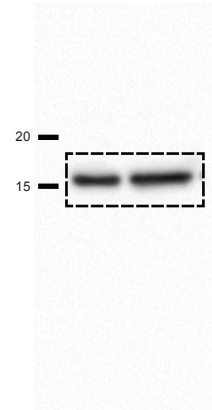

Total H3

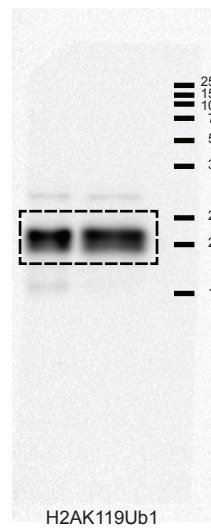

H2AK119Ub1

reblotting →

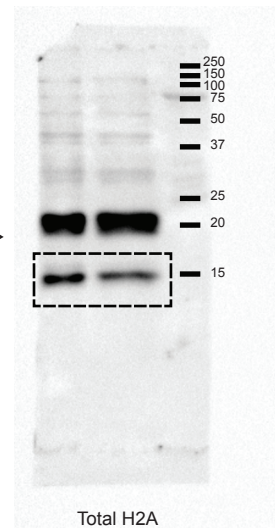

Total H2A

Supplement: EMBJ-35-2301-s005.pdf [file EMBJ-35-2301-s005.pdf]
